# Supplementary material
Source: Springer Nature journal article supplement (https://www.springermedizin.de/resource/supplementary/12904_2014_207_MOESM1_ESM.pdf/9517774)

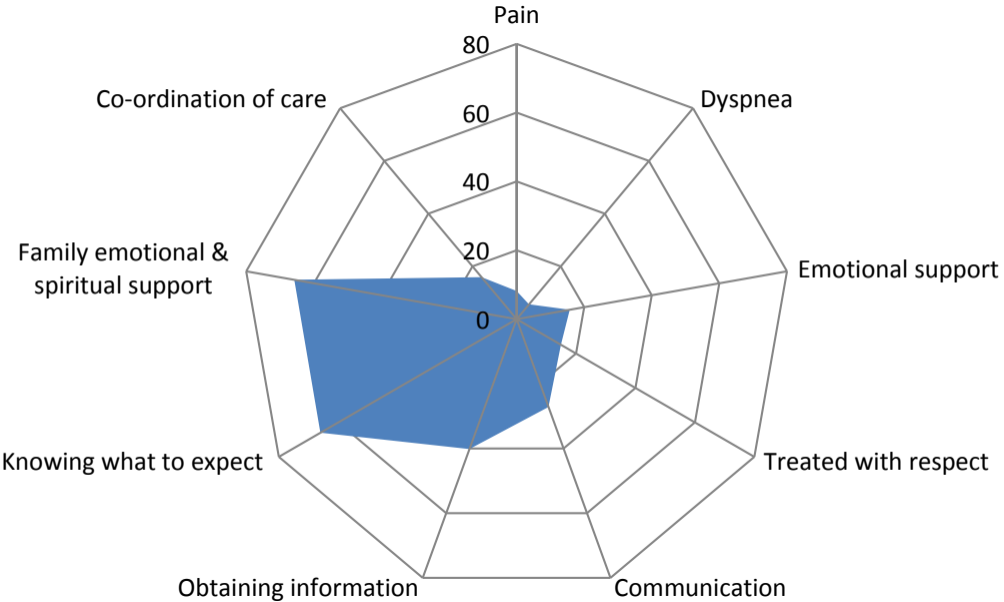

Supplement: MOESM1 [file 9517774]
